# Supplementary material for: GP88/PGRN Serum Levels Are Associated with Prognosis for Oral Squamous Cell Carcinoma Patients
Source: Biology (Basel). 2021 May 4;10(5):400. doi: 10.3390/biology10050400 (PMC8147813; doi:10.3390/biology10050400)
Supplement: Supplementary file 1 [file biology-10-00400-s001.zip › biology-1176219-supplementary.pdf]

Supplementary Materials

# GP88/PGRN Serum Levels Are Associated with Prognosis for Oral Squamous Cell Carcinoma Patients

Thomas Greither, Tina Steiner, Matthias Bache, Ginette Serrero, Sven Otto, Helge Taubert, Alexander Eckert and Matthias Kappler

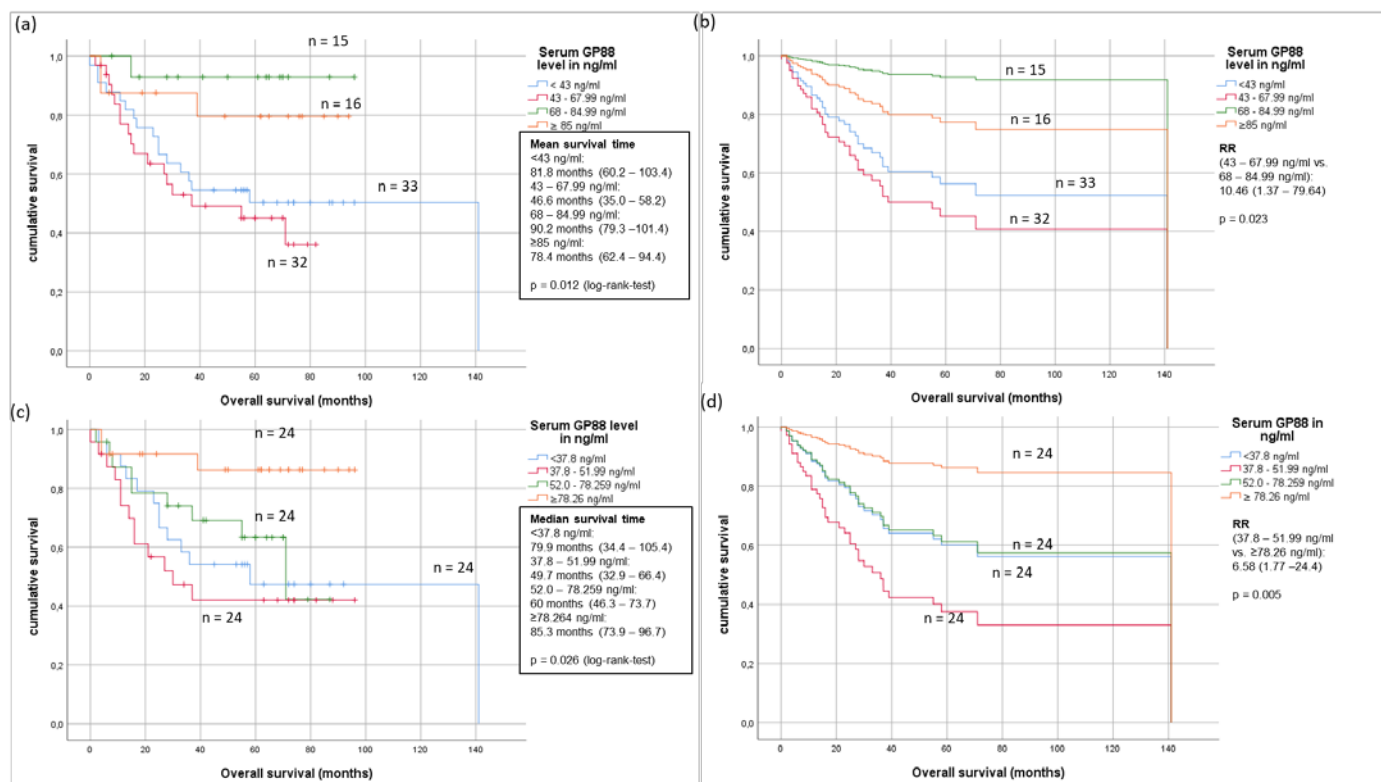

**Figure S1.** Kaplan-Meier (a;c) and multivariate Cox Regression (c;d) survival analyses of serum GP88 levels in OSCC patients with subgroups according to the Youden index optimized subgroups (a) and (b) and quartiles (c) and (d). Multivariate Cox Regression analyses were adjusted according to T, N and G.

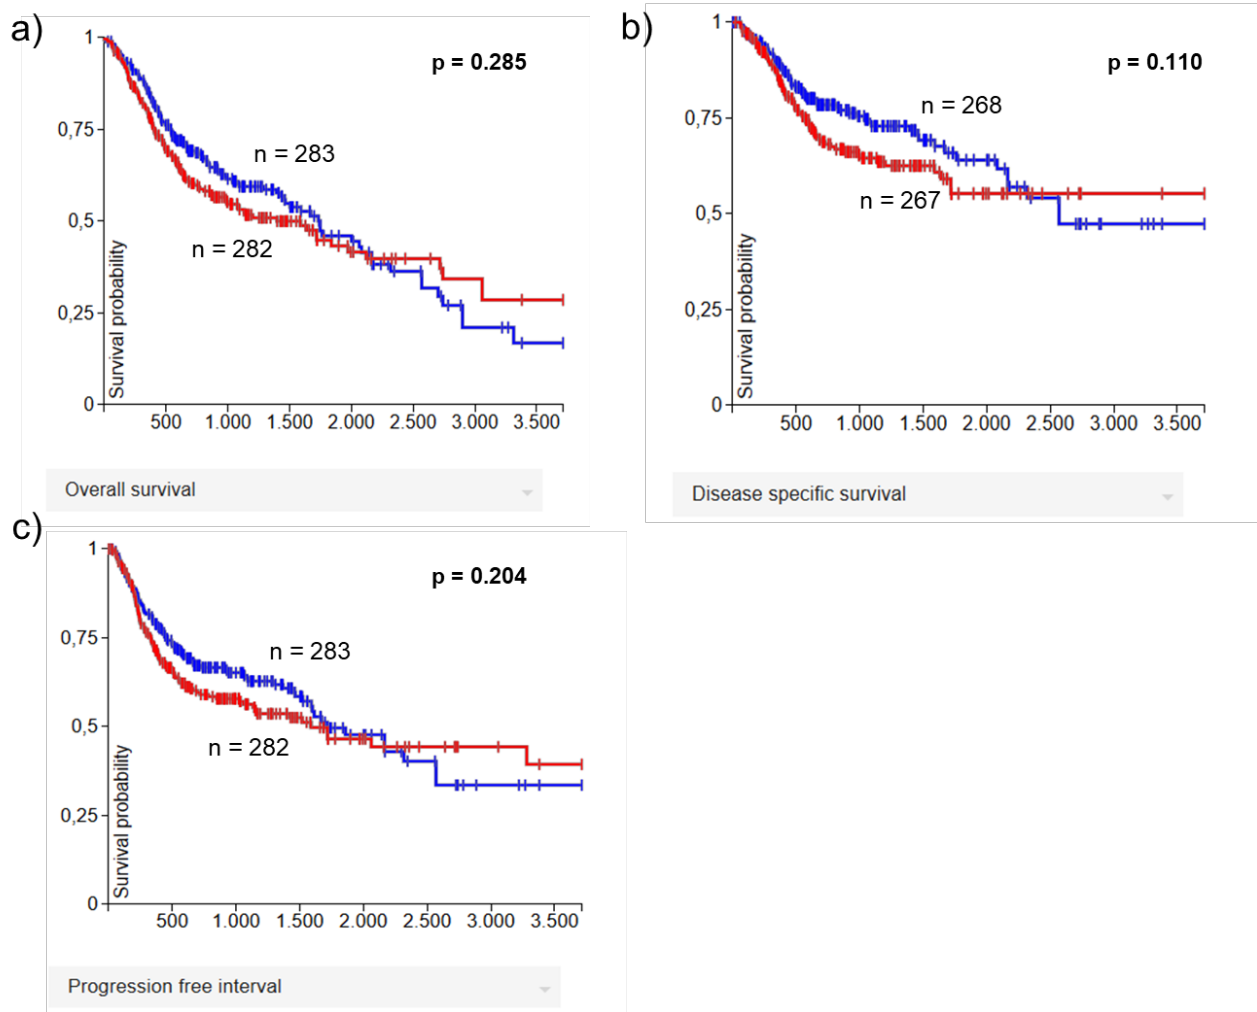

**Figure S2.** Kaplan-Meier survival analyses of the PGRN transcript in head and neck squamous cell carcinoma including OSCC patients regarding the (a) overall survival, (b) the disease-specific survival or (c) the progression free interval using TCGA data. Kaplan-Meier curves were drawn with the help of the USCS Xena program (University of California Santa Cruz; <https://xenabrowser.net>).

**Table S1.** Multivariate Cox Regression analyses regarding the impact of T stage, N status and Grading on patients survival in addition to serum GP88 levels (cut-off value: 68 ng/ml). RR = relative risk.

| Parameter | n  | RR   | 95% CI      | p    |
|-----------|----|------|-------------|------|
| T1        | 21 |      | reference   |      |
| T2        | 34 | 1.29 | 0.43 - 3.83 | 0.65 |
| T3        | 20 | 2.08 | 0.67 - 6.46 | 0.20 |
| T4        | 21 | 2.02 | 0.61 - 6.63 | 0.25 |
| N0        | 60 |      | reference   |      |
| N1        | 12 | 2.83 | 0.53 - 6.30 | 0.34 |
| N2+       | 24 | 1.80 | 0.80 - 3.98 | 0.16 |
| G1        | 14 |      | reference   |      |
| G2        | 59 | 2.13 | 0.80 - 5.68 | 0.13 |
| G3        | 23 | 1.35 | 0.49 - 3.71 | 0.56 |

**Table S2.** Uni- and multivariate Cox Regression analyses on the impact of serum GP88 levels in male and female OSCC patients.

|        |                              | univariate Cox Regression analysis |                   |          | multivariate Cox Regression analysis |                   |          |
|--------|------------------------------|------------------------------------|-------------------|----------|--------------------------------------|-------------------|----------|
|        |                              | <i>p</i>                           | RR [95%CI]        | <i>n</i> | <i>p</i>                             | RR [95% CI]       | <i>n</i> |
| male   | GP88 serum level <68.0 ng/ml | 0.013                              | 4.55 [1.37–15.13] | 46       | 0.028                                | 3.98 [1.16–13.61] | 46       |
|        | GP88 serum level ≥68.0 ng/ml |                                    | reference         | 23       |                                      | reference         | 23       |
| female | GP88 serum level <64.3 ng/ml | 0.113                              | 5.32 [0.67–42.08] | 18       | 0.154                                | 4.97 [0.55–45.10] | 18       |
|        | GP88 serum level ≥64.3 ng/ml |                                    | reference         | 9        |                                      | reference         | 9        |

**Table S3.** Uni- and multivariate Cox Regression analyses on the impact of serum GP88 levels in patients with T1/2 or T3/4 tumors.

|      |                              | univariate Cox Regression analysis |                   |          | multivariate Cox Regression analysis |                   |          |
|------|------------------------------|------------------------------------|-------------------|----------|--------------------------------------|-------------------|----------|
|      |                              | <i>p</i>                           | RR [95%CI]        | <i>n</i> | <i>p</i>                             | RR [95% CI]       | <i>n</i> |
| T1/2 | GP88 serum level <44.1 ng/ml | 0.017                              | 3.72 [1.27–10.90] | 21       | 0.001                                | 8.22 [2.32–29.10] | 21       |
|      | GP88 serum level ≥44.1 ng/ml |                                    | reference         | 34       |                                      | reference         | 34       |
| T3/4 | GP88 serum level <63.4 ng/ml | 0.037                              | 8.42 [1.13–62.62] | 29       | 0.058                                | 7.17 [0.94–54.96] | 29       |
|      | GP88 serum level ≥63.4 ng/ml |                                    | reference         | 12       |                                      | reference         | 12       |

**Table S4.** Uni- and multivariate Cox Regression analyses on the impact of serum GP88 levels in patients with N0 or N+ tumors.

|    |                              | univariate Cox Regression analysis |                   |          | multivariate Cox Regression analysis |                   |          |
|----|------------------------------|------------------------------------|-------------------|----------|--------------------------------------|-------------------|----------|
|    |                              | <i>p</i>                           | RR [95%CI]        | <i>n</i> | <i>p</i>                             | RR [95% CI]       | <i>n</i> |
| N0 | GP88 serum level <63.0 ng/ml | 0.016                              | 4.58 [1.33–15.61] | 35       | 0.037                                | 3.98 [1.08–14.58] | 35       |
|    | GP88 serum level ≥63.0 ng/ml |                                    | reference         | 25       |                                      | reference         | 25       |
| N+ | GP88 serum level <68.0 ng/ml | 0.097                              | 5.54 [0.73–41.85] | 28       | 0.116                                | 5.69 [0.65–49.82] | 28       |
|    | GP88 serum level ≥68.0 ng/ml |                                    | reference         | 8        |                                      | reference         | 8        |

**Table S5.** Uni- and multivariate Cox Regression analyses on the impact of serum GP88 levels in patients with or without subsequent radiotherapy.

|       |                              | univariate Cox Regression analysis |                   |          | multivariate Cox Regression analysis |                   |          |
|-------|------------------------------|------------------------------------|-------------------|----------|--------------------------------------|-------------------|----------|
|       |                              | <i>p</i>                           | RR [95%CI]        | <i>n</i> | <i>p</i>                             | RR [95% CI]       | <i>n</i> |
| no RT | GP88 serum level <63.0 ng/ml | 0.006                              | 5.54 [1.63–18.87] | 40       | 0.006                                | 5.81 [1.67–20.24] | 40       |
|       | GP88 serum level ≥63.0 ng/ml |                                    | reference         | 30       |                                      | reference         | 30       |
| RT    | GP88 serum level <42.0 ng/ml |                                    | reference         | 12       |                                      | reference         | 12       |
|       | GP88 serum level ≥42.0 ng/ml | 0.095                              | 2.4 [0.86–6.68]   | 14       | 0.109                                | 2.98 [0.79–11.31] | 14       |
